# Supplementary material for: Repairing of N-mustard derivative BO-1055 induced DNA damage requires NER, HR, and MGMT-dependent DNA repair mechanisms
Source: PubMed Central journal article supplement (PMC4694865; doi:10.18632/oncotarget.4514), 2015-07-17
Supplement: oncotarget-06-25770-s001.pdf [file oncotarget-06-25770-s001.pdf]

## SUPPLEMENTARY FIGURES AND TABLES

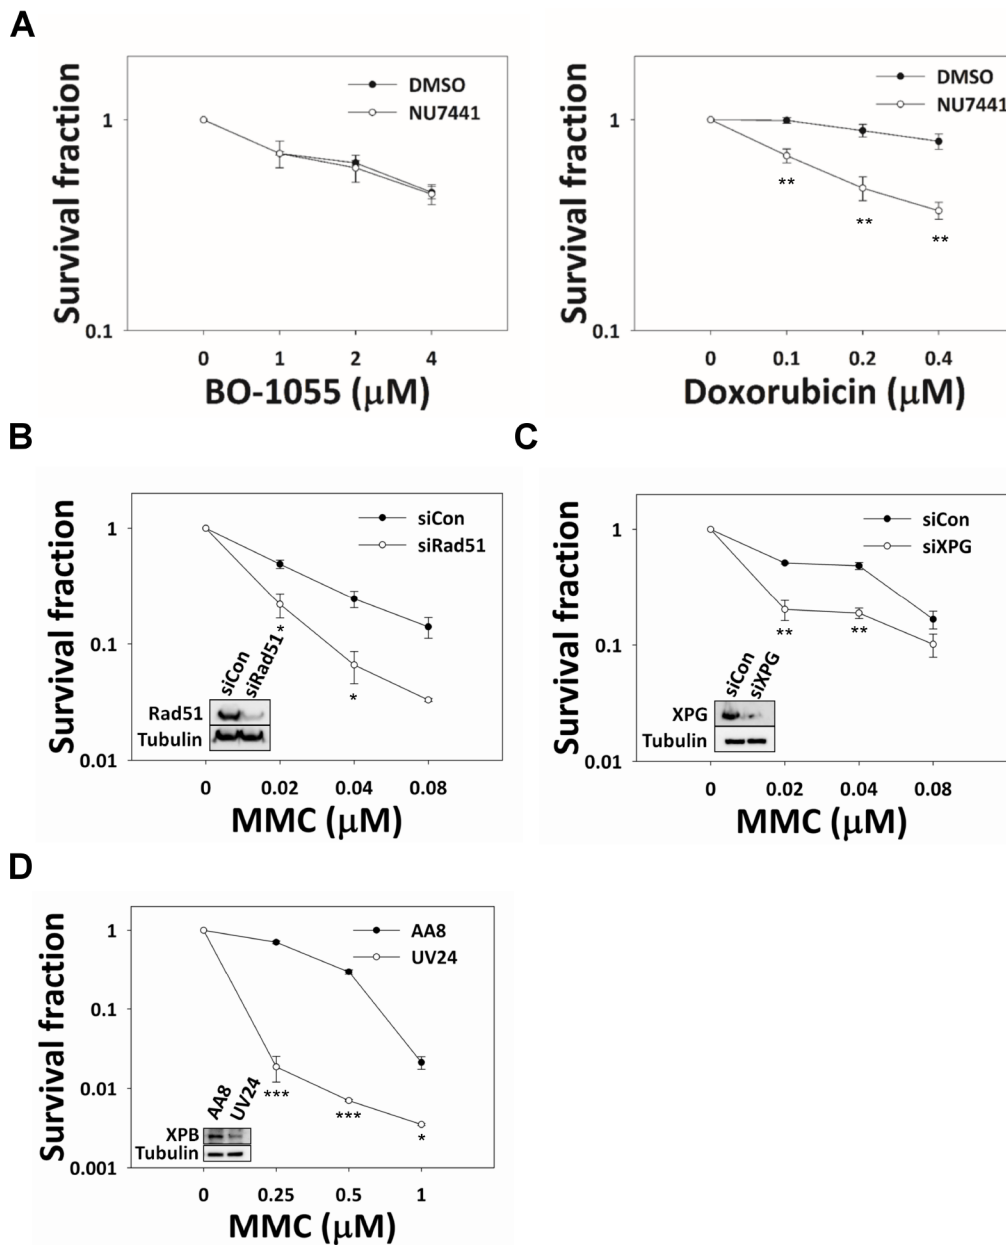

**Supplementary Figure S1: Involvement of HR and NER genes in drug sensitivity.** *In vitro* clonogenic survival of MCF-7 cells with DNA-PKcs inhibitor NU7441 **A.** or knockdown of Rad51 **B.** or XPG **C.** by siRNAs, or of *XPB*-defective UV24 CHO cells **D.** exposed to the indicated doses of BO-1055, doxorubicin, or MMC for 6-h. The immunoblots embedded in the clonogenic survival plots show the efficiency of gene knockdown for each individual experiment.

**A**

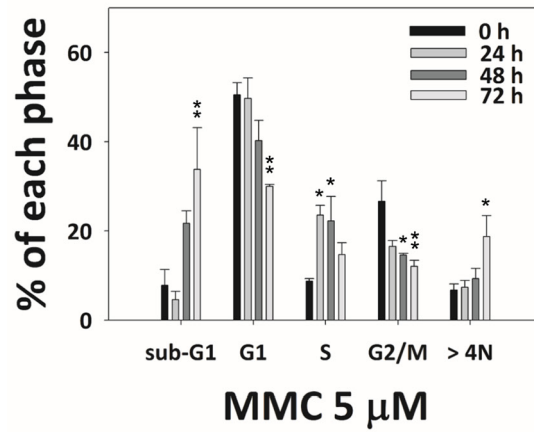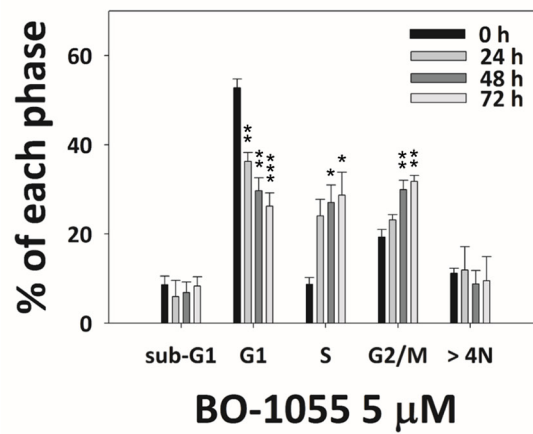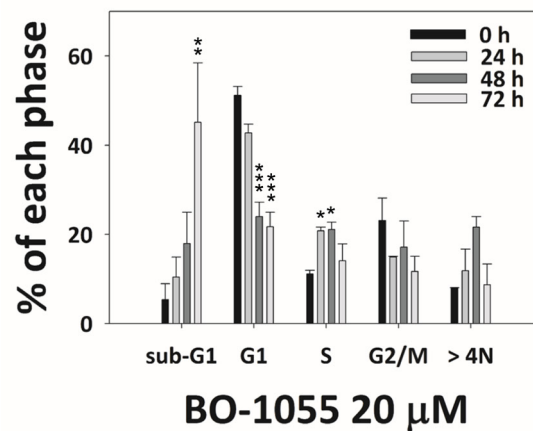

**Supplementary Figure S2: FACS analysis for cell-cycle distribution and cell death. A.** Quantitative results of FACS histogram analysis of DNA content by Figure 2D. (Continued)

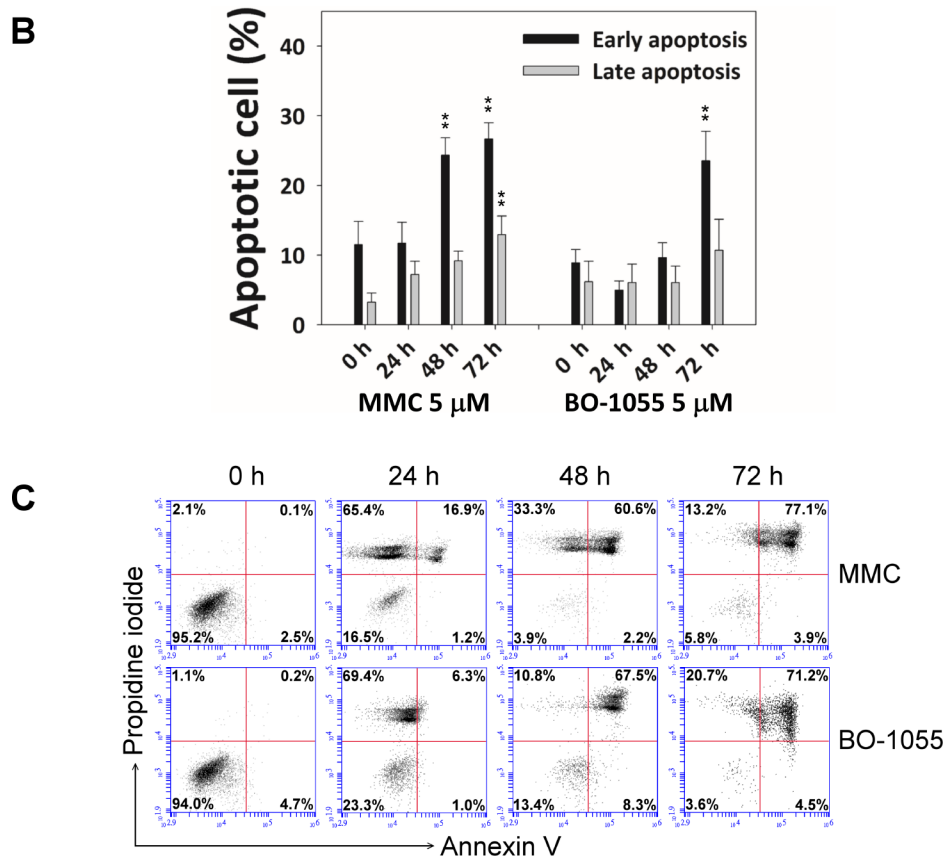

**Supplementary Figure S2: (Continued) FACS analysis for cell-cycle distribution and cell death. B.** Quantitative results of FACS dot-blot analysis for cell death by Figure 2E. The experiment of (A) and (B) were performed three times, and the quantitative results expressed as the mean  $\pm$  SEM. **C.** AnnexinV/PI double staining in living cells was conducted following the exposure of cultured MCF-7 cells to 20  $\mu$ M of MMC or of BO-1055 for the indicated times.

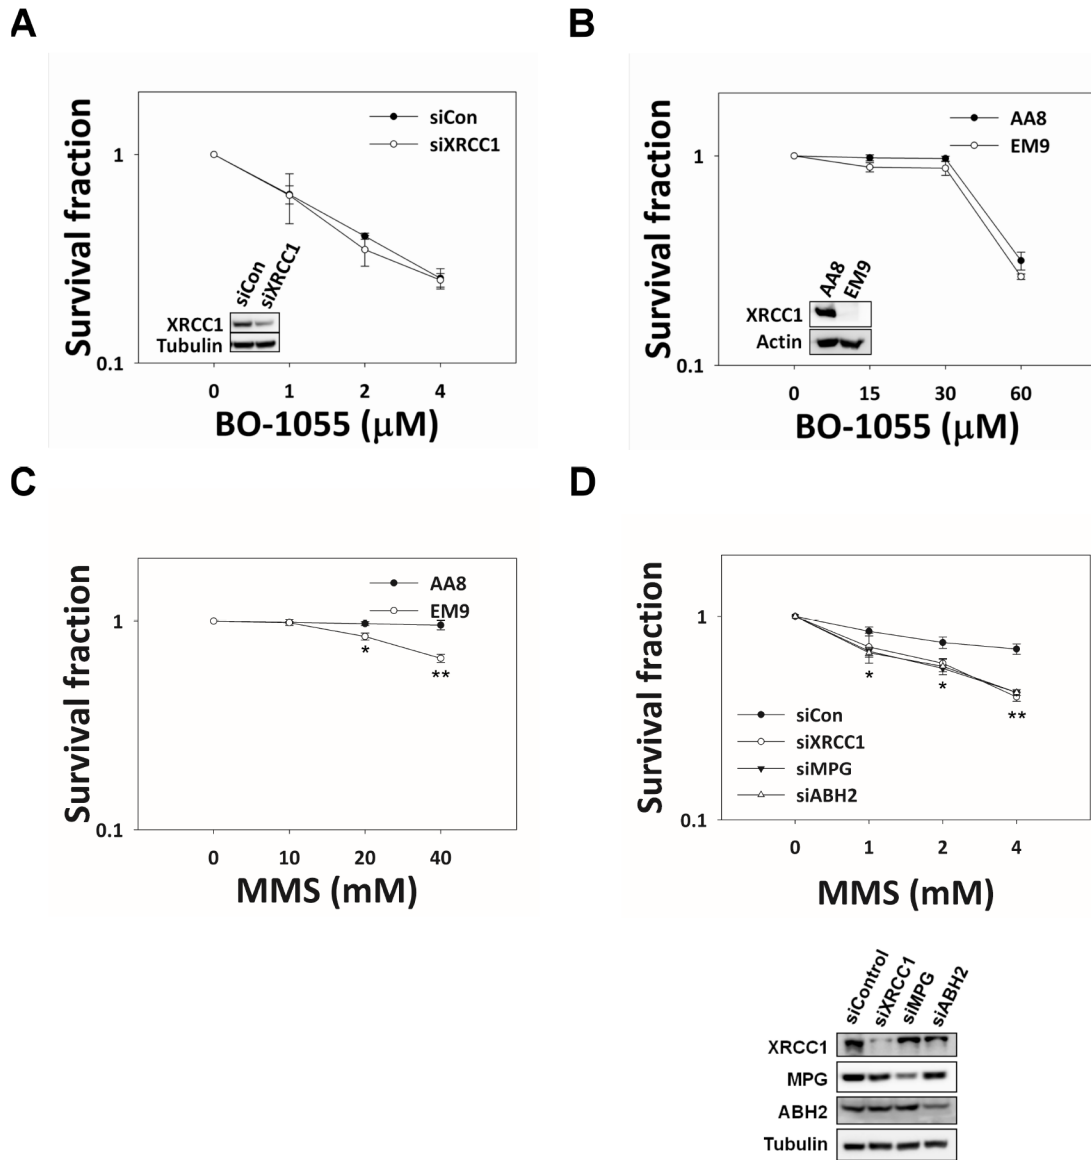

**Supplementary Figure S3: *In vitro* clonogenic survival assay.** MCF-7 cells with knockdown of XRCC1 **A.** or *XRCC1*-defective EM9 CHO cells **B.** exposed to the indicated doses of BO-1055 for 6-h. MMS sensitivity assayed in *XRCC1*-proficient AA8 or *XRCC1*-defective EM9 CHO cells **C.** or in MCF-7 cells with knockdown of XRCC1, MPG, or ABH2 by siRNAs **D.** The immunoblots embedded in the clonogenic survival plots show the efficiency of gene knockdown for each individual experiment.

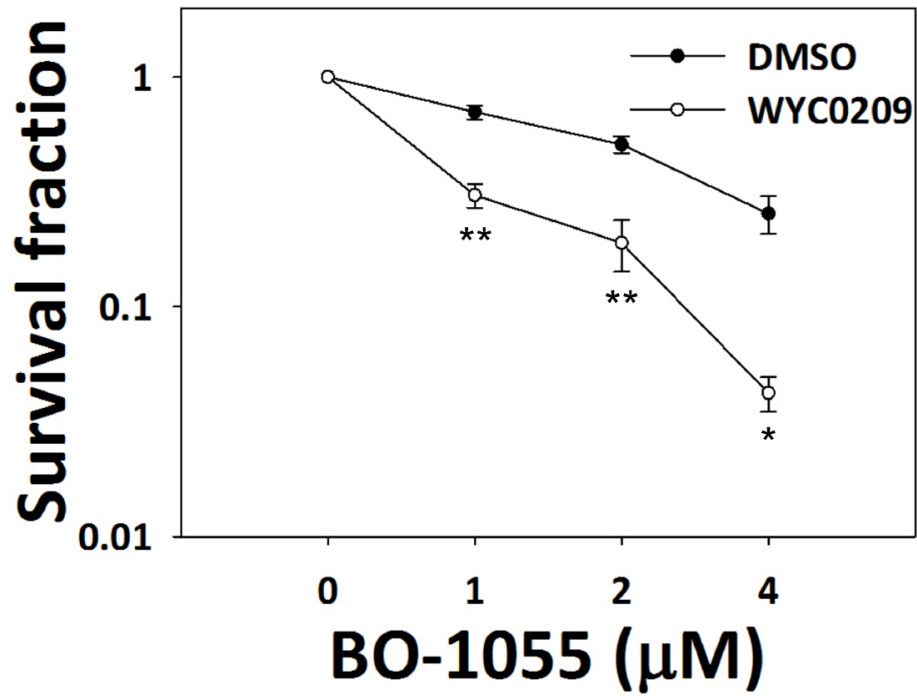

**Supplementary Figure S4: ATR inhibition by WYC0209 enhances BO-1055 sensitivity.** *In vitro* clonogenic survival assay of MCF-7 cells, following inhibition of ATR activity by 20 nM of WYC0209, with exposure of the MCF-7 cells to the indicated doses of BO-1055 for 6-h.

**Supplementary Table S1: Target sequences of siRNA oligos**

| Gene Name | Accession    | Target sequence           |
|-----------|--------------|---------------------------|
| XPG       | NM_000123    | ACCAAGCACTTAAAGGAGTCC     |
| ATM       | NM_000051    | AAGCGCTGATTCGAGATCCT      |
| Chk2      | NM_007194    | AATGTGTGAATGACAACACTACT   |
| Rad51     | NM_133487    | GAAGCTGGATTCCATACTGTG     |
| DNA-PKcs  | NM_006904    | GATCGCACCTTACTCTGTTGA     |
| XPB       | NM_000122    | GACTTCTTGGTGGCTATTGCA     |
| XRCC1     | NM_006297    | AACTCGACTCACTGTGCAGAA     |
| ABH2      | NM_001145374 | GACAGACCTTCAACTTTGTGCTCAT |
| MPG       | NM_002434    | AAGAAGCAGCGACCAGCTAGA     |
| MGMT      | NM_002412    | CTGCACGAAATAAAGCTCCTG     |
| Control   | None         | AAGTCAATATGCGACTGATGG     |

**Supplementary Table S2: Primary antibodies used in immunoassays**

| Targets                      | Species                              | Catalog       | Distributors           |
|------------------------------|--------------------------------------|---------------|------------------------|
| MPG                          | Mouse mAb (1E10)                     | H00004350-M04 | Abnova                 |
| Caspase-7                    | Mouse mAb (B94-1)                    | 554002        | BD pharmingen          |
| XPG                          | Rabbit pAb                           | A301-484A     | Bethyl                 |
| Phospho-p53 (S15)            | Mouse mAb (16G8)                     | 9286          | Cell signaling         |
| Phospho-Chk2 (T68)           | Rabbit mAb (C13C1)                   | 2197          | Cell signaling         |
| Phospho-Chk1 (S345)          | Rabbit mAb (133D3)                   | 2348          | Cell signaling         |
| Chk2                         | Mouse mAb (1C12)                     | 3440          | Cell signaling         |
| Caspase-8                    | Mouse mAb (1C12)                     | 9746          | Cell signaling         |
| XPB                          | Rabbit pAb (C1C3)                    | GTX112923     | GeneTex                |
| ATM                          | Mouse mAb (2C1)                      | GTX70103      | GeneTex                |
| Mouse IgG                    | Alexa Fluor® 488 goat anti-mouse IgG | A-11001       | Invitrogn              |
| Mouse IgG                    | HRP-conjugated goat anti-mouse IgG   | 115-035-146   | Jackson Immunoresearch |
| Rabbit IgG                   | HRP-conjugated goat anti-rabbit IgG  | 111-035-144   | Jackson Immunoresearch |
| MGMT                         | Mouse mAb (MT3.1)                    | MAB16200      | Millipore              |
| Phospho-histone H2A.X (S139) | Mouse mAb (JBW301)                   | 05-636        | Millipore              |
| Chk1                         | Mouse mAb (G4)                       | sc-8408       | Santa Cruz             |
| Rad51                        | Rabbit pAb (H92)                     | sc-8349       | Santa Cruz             |
| FANCD2                       | Mouse mAb (FI17)                     | sc-20022      | Santa Cruz             |
| Caspase-9                    | Rabbit pAb (F7)                      | sc-17784      | Santa Cruz             |
| PARP1                        | Mouse mAb (F2)                       | sc-8007       | Santa Cruz             |
| Phospho-ATM (S1981)          | Mouse mAb (10H11.E12)                | sc-47739      | Santa Cruz             |

(Continued)

| Targets           | Species                   | Catalog | Distributors      |
|-------------------|---------------------------|---------|-------------------|
| ABH2              | Mouse mAb (hABH2-7)       | A8228   | Sigma-Aldrich     |
| Actin             | Rabbit pAb                | A2066   | Sigma-Aldrich     |
| $\alpha$ -Tubulin | Mouse mAb (DM1A)          | T6199   | Sigma-Aldrich     |
| XRCC1             | Mouse mAb (33-2-5)        | MS-434  | Thermo Scientific |
| DNA-PKcs          | Mouse mAb Cocktail (Ab-4) | MS-423  | Thermo Scientific |

### Supplementary Table S3: Cytotoxicity of compounds in MCF-7 cells

| Compounds          | IC <sub>50</sub> values ( $\mu$ M) |
|--------------------|------------------------------------|
| BO-1055            | 13.92 $\pm$ 0.84                   |
| MMC                | 5.74 $\pm$ 0.08                    |
| BCNU               | 161.05 $\pm$ 1.03                  |
| O <sup>6</sup> -BG | 143.75 $\pm$ 7.11                  |

IC<sub>50</sub> values refer to the concentration needed to induce 50% of cell death following treatment with the indicated compounds. Cells were treated with the compounds at various concentrations ranging from 1–20  $\mu$ M, or from 1–200  $\mu$ M, for 48 hours. Cell survival was determined using the MTT assay, and the IC<sub>50</sub> values are represented as the means  $\pm$  SE of three independent experiments carried out in triplicates.
